# Supplementary material for: Host plant defense produces species specific alterations to flight muscle protein structure and flight-related fitness traits of two armyworms
Source: Oxford University Press journal article supplement (doi:10.1242/jeb.224907), 2020-01-01
Supplement: jeb224907supp.pdf [file jeb224907supp.pdf]

### Supplemental Figure – Portman et al. JEB

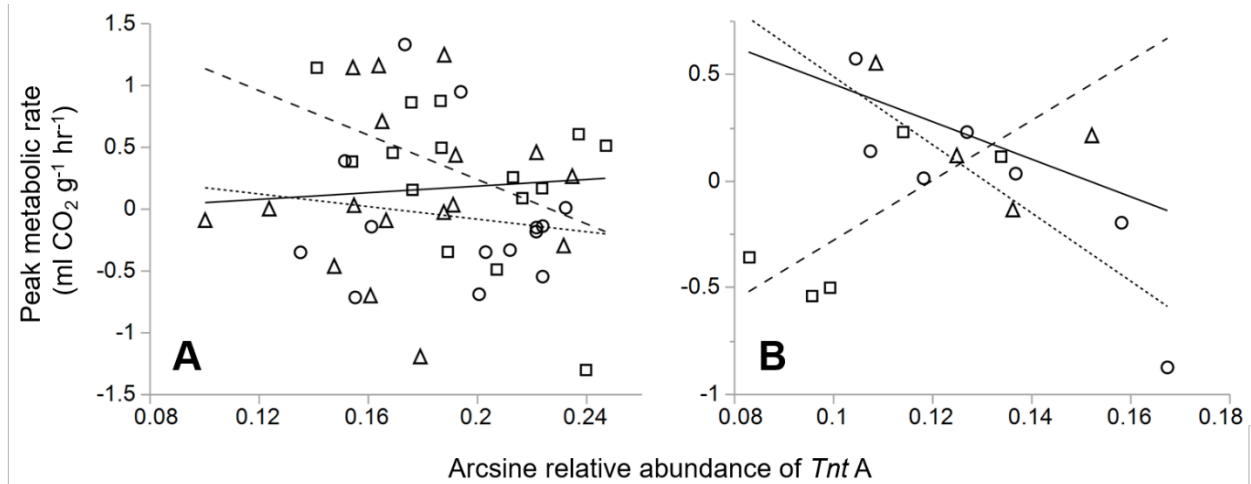

**Fig. S1** Scatter plot with regression lines showing mass-adjusted flight metabolic rate of (A) southern armyworm and (B) fall armyworm adult moths in relation to the relative abundance of *Tnt A* in their flight muscles.

Open circles and dotted lines are from adults that were reared on JA deficient plants; open squares and dashed lines from pupae reared on MeJA induced tomato plants; open triangles and solid lines represent pupae reared on control tomato plants (Castlemart).
